## Burdens and Risk Groups of Road Crashes

# Multiple Burden of Road Traffic Crashes among Risk Groups: A Patient Perspective Approach in Mid-hilly District of Nepal

Sapana Bishwokarma<sup>1</sup>; Chiranjivi Adhikari<sup>1,2\*</sup>; Dhurba Khatri<sup>1</sup>; Bikash Gauchan<sup>3</sup>; Vishnu Prasad Sapkota<sup>4</sup> and Chhabi Lal Ranabhat<sup>5</sup>

<sup>1</sup>Pokhara University, School of Health and Allied Sciences, Pokhara, 33700, Kaski, Nepal

<sup>2</sup>Indian Institute of Public Health Gandhinagar (IIPHG), Gandhinagar, 382042, India

<sup>3</sup>Infectious and Tropical Disease Hospital, Pokhara, Kaski, Nepal

<sup>4</sup>Department of Economics, Nepal Commerce Campus, Tribhuvan University, Nepal

<sup>5</sup>Department of Health Promotion and Administration, Eastern Kentucky University, USA

### \*Correspondence:

Chiranjivi Adhikari

[chiranadhikari@gmail.com](mailto:chiranadhikari@gmail.com)

### Abstract

**Background.** Economic burden and cost-related evidence from primary data of road traffic crashes (RTCs) in Nepal are limited. **Aim.** This study assessed the disability-adjusted life years (DALYs) and the cost associated with RTCs. **Methods.** We carried out a retrospective cross-sectional institution-based survey of the victims of road traffic crashes (RTCs) in the last one year to 45 days prior in Kaski, a mid-hilly district of Nepal. A total of 107 RTC victims, registered in different hospitals, the Police Offices and health insurance offices, were approached. A semi-structured interview schedule was used to collect information. Data were entered in EpiData and then imported to the Statistical Package for Social Sciences (SPSS) for further analysis. Descriptive statistics were obtained by calculating the costs and DALYs, and inferential analysis was carried to explore the relationship of DALYs with independent variables. **Results.** Of 107 victims, more than one-third (37.4%) were 25-44 year-age group; more than half (60.7%) were male. Cost per million person-years of RTC was around US \$ 82800. Similarly, around 1018 DALYs per million person-years are attributed to RTC, and more than 99% of it was shared from YLL. We observed statistical significance ( $p < 0.05$ ) in the level of education, indirect cost and total cost with DALYs. Breadwinner males and motor-cyclists were the most frequent victims of RTC for which negligence, overtaking and high speed of the vehicle were the most frequent reasons for the injuries. **Conclusion.** Cost and DALYs associated to RTC of Kaski district were around US\$ 82800 and 1018 per million person-years in 2017, respectively. Male motorcyclists of productive age-group were the most frequent victims.

**Keywords.** Road traffic crash, RTC, DALYs, Cost of illness, Disability, Nepal

## Burdens and Risk Groups of Road Crashes

### 1. Introduction

A road traffic crash (RTC) is a collision or incident involving at least a moving vehicle, in which the injured may die or seek a medical treatment or an assistance within 30 days of the trauma (1, 2). Based on the severity of the incident, an RTA can be fatal or non-fatal whereas outcome intensity may result in fatal, serious and slight injuries (3, 4). The overall definition and analysis of the severity of outcomes of any road traffic crash depend on the theoretical definitions of disability adjusted life years (DALYs) and years of life lost (YLL). Here, DALY refers to the quantifies health gaps as distinct to health to heal expectancies and YLL indicated to the years lost due to untimely death due to accidents (5).

Because children, pedestrians, and bicyclists often rely on the road for their daily activities, they are the most vulnerable and susceptible to traffic crash (6). Each year, approximately 1.35 million people die from RTC, the leading cause of death in the 5-29 age group (7). In developing countries, safety measures to prevent accidents are almost entirely negotiable resulting in pedestrians being involved in accidents more frequently than non-pedestrians (7, 8). This has led to a significant increase in accidents, especially among road users. This has ultimately had a negative impact on human, economic and social costs within a nation and its communities (8).

In 2004, an estimation of road traffic collision showed that approximately 2.7 percent of total DALYs losses were due to road traffic crashes, and this proportion is expected to increase to 4.9 percent by the year 2030 (9). RTC was reportedly accounted for 36% of the DALYs in 2017 (10). These data provide a clear explanation for the placement of road traffic accidents in the position of the third leading cause of global burden of disease worldwide. In low- and middle-income countries (LMICs), costs of 1 to 1.5 percent of GDP are required for road traffic crashes indicating that the health care budgets are particularly constrained in LMICs like Nepal (11). Some of the world's most rugged and difficult mountain terrains, covering around three-fourths of the total geography, and so, having roads as most commuting modes of transportation, are furthering the RTCs in Nepal. However, evidence of the lost lives in such crashes and their economic cost is scant. Hence, the study aims to estimate the loss of DALYs and total cost associated with RTC.

### 2. Material and method

*2.1. Study setting.* Kaski, a hilly district and the headquarter of Gandaki Province of Nepal, contains the largest metropolitan (Pokhara, geographically) of the country, was selected as a study area. Surface transportation facilities, including feeder roads to national highways, district roads, and village roads, are increasing significantly, and district and rural roads are in poor condition and are in needs of regular maintenance (12). Nepal is basically a hilly country (nearly 83% geography is covered by hills and mountains), therefore, these conditions have also been regarded as direct or indirect reasons behind the yearly increase in road traffic crashes in Kaski district.

*2.2. Study design and sample size.* It was a cross-sectional institution-based survey with retrospective approach. We reached RTC victims registered from one year to 45 days prior to the survey conducted in 2017 November, in five out of 16 hospitals (from emergency ward register

## Burdens and Risk Groups of Road Crashes

records), traffic and police offices and insurance office of Kaski district. Of 158 records, we included 107 RTC victims in the study (fig. 1).

*2.3. Data collection, ethics and quality assurance.* In a predesigned and tested record format, we filled on the victims' names, addresses, contact numbers and types of injury. With the help of the phone numbers provided in the documents, we contacted the victims or their family members for permission and date to interview. A tested interview pro forma among 20 RTC victims of Syanja, a similar hilly and boundary shared with Kaski district, was used individually at victim's house or his/her convenient place, which consisted of five sections- socio-demographic characteristics, economic status, information on accidents, direct and indirect costs accrued to victims and their caregivers and the information of disabilities-adjusted life years of the participants. After getting ethical clearance from Pokhara University Research Center (Ref no. 26/074/75), data were collected through face-to-face interview technique. In case of victim's inability to respond or posthumous, we interviewed his/her nearest kin. Ethical norms regarding respondents' dignity and confidentiality were maintained as per Helsinki and subsequent declarations. Responses regarding both costs-accrued to victims and the accidents were verified through prescription slips and medical bills and vouchers. In case of unrecorded costs and ambiguities, we further probed and assessed.

*2.4. Statistical analysis.* Raw data were cleaned; coded and entered in EpiData version 3.1 and all then imported to the Statistical Package for Social Science (SPSS) for further analysis. International Wealth Index (IWI) was used for economic status in which 12 questions were asked and household level IWI scores were collated with MS-Excel and then in EpiData software. Cost calculation and converting it to a figure, and DALY's estimation were also performed in MS-Excel. We carried out the Welch's unpaired t test (two-tailed) for the mean differences of DALYs for various socio-demographic characteristics since it is preferred over student's t-test and the Mann-Whitney U test when the two comparing groups have unequal variances (13). We carried out the online calculation for the p values of the test (14).

*2.5. Cost calculation.* Cost calculation was categorized as direct and indirect, and the calculation was done accordingly. Direct cost calculation accrued as the summation of all the costs that were paid for the medical treatment including all the bills starting from the registration charge to follow up. Indirect costs are not directly related to the cost of treatment and productivity loss, so, for the calculation of productivity loss, if any victim has died and fell into the category of economically active age group, average daily wage rate of a minimum of NRs 318 (US\$ 3.1) (15), according to the Nepal Government, which was applied for the unemployed and whose monthly income was unknown. The indirect costs included were- transportation charges, bed charge, food charges and additional costs. The costs for both victims and caretakers were taken into account, and total indirect cost was calculated using the standard formula (16).

For

victim=[(no. of inpatients and days visiting medical facilities +  
no. of days at home from recovering of injuries) \* (average wage of victim) +  
additional cost]

For caregiver=

[(no. of inpatients and days visiting medical facilities +

## Burdens and Risk Groups of Road Crashes

no. of days at home caring for recovering of injuries) \* (average wage of caregiver)] + additional cost

Loss =  $\sum \frac{W(1+g)^i}{(1+r)^i}$ , the formula, was used to measure the productivity loss where,

W denotes annual per capita gross domestic product, ie, NRs. 699.19 (US\$ 5.88), g, the annual economic growth rate, ie, 0.041 (17), r, the discount rate, ie, 0.03 (18), and, i, the average number of years lost due to fatal injuries (age of people died subtracted from standard life expectancy, ie, 71 years).

**2.6. Calculation of DALYs.** Disability-adjusted life years are calculated with the sum of years of life lost and years of life lived with disability (YLDs), as used in 1990 and the 2004 global burden of disease (GBOD) studies (19), as follows:

$$YLL[r, K, \beta] = \frac{KCe^{ra}}{(r + \beta)^2} \{e^{-(r+\beta)(L+a)}[-(r + \beta)(L + a) - 1] - e^{-(r+\beta)a}[-(r + \beta)a - 1]\} + \frac{(1 - K)}{r} (1 - e^{-rL})$$

$$YLD[r, K, \beta] = DW \left\{ \frac{KCe^{ra}}{(r + \beta)^2} \{e^{-(r+\beta)(L+a)}[-(r + \beta)(L + a) - 1] - e^{-(r+\beta)a}[-(r + \beta)a - 1]\} + \frac{(1 - K)}{r} (1 - e^{-rL}) \right\}$$

Here, the assumption for discount rate (r) of 0.03, age-weighting modulation constant (K) of 1, parameter from the age-weighting function ( $\beta$ ) of 0.04, and age-weighting correction constant (C) of 0.1658 were taken from the standard values given by the Global Burden of Disease Study (8, 20).

In case of YLL, age of death (years) is denoted by “a” and standard life expectancy at the age of death (years) is denoted by “L”.

In case of YLD, age of onset (years) is denoted by “a” and duration of disability (years) is denoted by “L”. DW (disability weight) was assigned based on severity weights ranging from 0 (representing perfect health) to 1 (representing death) as per protocol.

### 3. Results

**3.1. Socio-demographic characteristics.** Out of total (107) victims, plurality (37.4%) belonged to 25-44 year-age group and upper caste (46.7 %). Similarly, the majority (60.7%) of the participants were male and it was found that 7.5% of respondents were illiterate and only 32.7% of respondents had studied a bachelor's degree or above. A total of 59.8% were employed while the rest were unemployed. All quintile categories fell in almost equal proportions (table 1).

**3.2. Road traffic crash and its various dimensions.** Of 107 victims, more than four-fifths (82%) were injured and still were suffering from different types of disabilities during the survey period, and the rest (18%) had lost their lives. Adjusted to per million person-years, death due to RTC was 37.7. Serious Injury was high with 50% compared to slight injury

## Burdens and Risk Groups of Road Crashes

(33.6%) and fatal injury (15.9%). Finding reveals that, motorcyclists were affected most followed by bus/truck. There exist several reasons behind the accident- overtake/ over speed (27.1%) stood the highest in proportion, followed by carelessness of the driver/ pedestrian (25.2%) (table 2).

*3.3. Cost of road traffic crashes.* Out of the total cost of NRs. 4303724.34 (US \$41844.7), the direct cost (NRs. 2274196 (US \$2211.8)) was slightly higher than the indirect cost. However, it was inverse in the cases of slight and fatal injuries. The currency conversion was done as per exchange rate of Central Bank of Nepal (Nepal Rastra Bank) dated Dec , 2017 (15) (figure 1). The dissimilar error bars of the standard error show the unequal variances between the costs.

*3.4. Total DALYs lost.* Total number of YLL and YLD were 7959.7 and 8.8 per million person-years, respectively. Almost all proportion of DALYs (99.9%) was shared by YLL (table 3).

*3.5. Socio-demographic variables and DALY.* We did not find statistically significant difference in means of DALYs among different socio-demographic groups. There was no difference between the mean DALYs of active and inactive age groups ( $p=.13$ ), literate and illiterate ( $p=.74$ ), male and female ( $p=.93$ ), and employed and unemployed ( $p=.14$ ) (table 4).

*3.6. Correlation between cost and DALYs.* Indirect cost for the victim ( $r=0.33$ ,  $p<.001$ ) and the total cost ( $r=0.2$ ,  $p=.039$ ) were moderately and lowly respectively correlated with DALYs whereas it was not statistically significant with indirect cost for caregiver ( $p>.05$ ) and the direct cost ( $p>.05$ ) (table 5).

## 4. Discussion

Calculation based on total medical expenses, productivity loss, lost income during the period of accident and survey, and different indirect costs. The study findings reflect the portentous situation of RTC and the victims in Kaski district. The pronest groups, costs, types of injuries, DALYs and impacts, and the associated factors are discussed.

Majority RTC victims were male and employed (both more than 60%, of which 30% were in service job). Most victims felled in 25-44 year-group (37.4%), had a university degree (33%), and belonged to the highest economic quintile (38%). A Similar study among brain injury victims among motor-cyclists, carried out in Nigeria showed that nearly three-fourths (73.96%) felled in 20-50 year-group (21). Despite similar topography but different elevations from sea level, as compared to 121 deaths in Sana'a city of Yemen, ours had a quite lower (37.7) mortalities per million person-years (22). This may probe to further research in Kaski, and country-wide, focusing mass transport, speed limit, and gross anatomy of the roads like straightness, levels, and grades. The Sana'a city study revealed that more than half RTCs occurred in straight roads (22) whilst another study carried out in Iran showed that more than three-fourth RTCs (77.6%) occurred in straight and level roads followed by 13.5% in curve and level, and then negligible in curve and grade (5.3%), and straight and grade (3.6%) roads (23). These factors be explored in the context of Kaski and further research. Another major issue is that the most victims are the breadwinners, who generate the economic returns for the family, community and the nation. Studies conducted in the capital metropolitan (8) and in eastern Nepal (24) have shown that proportion of men is even higher. These findings are also in line with



## Burdens and Risk Groups of Road Crashes

those of other countries, such as Valencia, Spain (25) , Pakistan (26), Haryana, India (27) and Tanzania (28). Furthermore, it was revealed that nearly half of the accidents involved motorcycle and one fifth involved buses/trucks. Similar results were also found in studies conducted in other cities of Nepal(8, 29) and in Kenya(30). In addition, pedestrians were also seen as one of the affected groups (29) due to the poor knowledge of the road safety. High speed and overtaking followed by carelessness of riders or pedestrians, road conditions, drinking and driving, violation of traffic rules and vehicle conditions are some of the reasons found in the RTI studies carried out by Thapa (29) and Sapkota et al.(8). The observed risk of males to be victimized may be due to their risk-taking behavior fueled by alcohol consumption, mobility in nature, and engagement in outdoor activities more than their female counterparts, resulting in a heightened risk of accidents. This is further supported with the findings of the study in Kathmandu by Sapkota et al. (8) , in Ghana (31), WHO global report (30) and Vietnam (31). The main reasons for overtaking and negligence from our study were consistence with driver negligence as the main cause, followed by high speed and overtaking are revealed in the WHO report (16) and studies carried out in other cities of the country (8, 29) .

The fact that male workers were victimized to a greater extent in our study could be due to the higher proportion of men in the sample and the ratio of male to female workers in Nepal.

The finding that more than a half of the victims being found with severe injuries is also consistent with the study conducted among the victims of motorbike accidents in Kathmandu, Nepal (8, 29,32). The mortality rate following RTC in the present study of 16% is also consistent with that conducted in other developing countries, where it ranged from 10-30%(33, 34). Similar to our findings, a community based study from Nepal showed that the lacerations were the most common type of injury followed by fractures(8).

Low positive and negligible correlations of DALYs and indirect cost of victim ( $r=0.33$ ;  $p<0.001$ ) and the total cost ( $r=0.19$ ,  $p=0.039$ ), respectively. Descriptive statistics showed that indirect costs were higher than direct costs in minor and fatal injuries whereas it was inverse for the serious injuries (table 3). In line with slight and fatal injuries, higher indirect costs than direct costs were noted in the study of motorbike accidents in Kathmandu (8) . Because of the productivity loss of the victims and the caregivers, calculated for indirect costs might have shown the higher values. Variations in costs from one to another country may be found due to the variations in health-care delivery systems, insurance provision and patterns, service costs, driving culture and traffic rules, and many more.

The majority of the victims in these studies were the household heads and breadwinner of the families, and their deaths and injuries could have potentially long-term implications on the financial sustainability and their social well-being (8, 30). Moreover, the out-of-pocket expenditure (OOP) incurred for the treatment of the victim leads family to further impoverishment (34). So, the economic impacts of the injuries, mainly the RTIs, are both high in OOP and the productivity loss (8, 35, 36).

Total cost and the DALYs associated to RTC in Kaski district in 2017 were around US\$ 82800 and 1018 per million person-years, respectively, as of projected population of the country in 2017 (37, 38). A similar study carried out in Kathmandu valley, the capital city, and then extrapolated at a national level, found a much lower cost, i.e., US\$ 5993 per million person-

## Burdens and Risk Groups of Road Crashes

years of population (39). This larger variance indicates that Pokhara loses greater proportion of cost associated with RTC when compared at national level. However, the estimated costs from the societal perspectives (after calculated on incidence-based cost-of-illness) at national level in 2020 showed a quite higher loss of the cost, that is US\$ 463,794 per million population (39). These significantly higher cost compared to our study are due to the costs added for grief, pain and sufferings and other production costs (39). However, the proportion of direct cost in our study was significantly higher (52.8%) than in the study (10.6%) of costs estimated from societal perspectives (39). A burden of injuries study carried out in 2017 from secondary data of GBOD study 2016 showed the DALYs loss of 14052 per million person-years from 'transport injuries' of which 90% (around 12647) is from RTCs (40). It showed that national average of DALYs lost is quite higher than the findings of current study (around 1018 per million person-years) which may be due to the lower coverage in the current study.

*5.Limitation.* The study has many limitations. Firstly, limited sample of 107 RTC victims, mainly from Pokhara valley and her surroundings (as some hospitals denied to give permissions), may be less representative and therefore, generalizability with less confidence (20% prevalence with  $\pm 5\%$  absolute error with 80% confidence level, yields 106 samples) (41). Related to sample size, minimal YLL value was obtained as compared to YLD, that also be taken cautiously. Secondly, the victims who were taken outside Pokhara for treatment (may be, to Kathmandu, where the national trauma center and other tertiary level hospitals are available, and also, to India) could not be covered. Thirdly, many minor and some moderate cases that were not taken to hospitals have also been missed. Fourthly, the study could not cover the cost of vehicle and general damage, future medical expenses, and the cost of sufferings and other societal values attributable to the crash, have not been calculated, and fifthly, the cost attributable to co-morbid conditions of the victims has not been adjusted. Despite these limitations, primary data-based cost and DALYs of RTC are scarce and so, recommended to apply with caution.

*6.Conclusion.* RTC per million person-years cost of Kaski district was around US\$ 82800, and more than half of it was associated with the direct cost. Similarly, the DALYs lost were 1018 person-years per million of population and share of YLD was negligible. The direct cost accrued is quite higher but the DALYs lost are quite lower than the national average. Mostly, the victims of RTCs are from productive age-group and the motor-bikers. The main reasons behind these injuries are negligence, overtaking, and high speed, however, may need further stronger designs to make a firm decision.

### Conflicts of Interest

None declared.

### Authors' Contribution

SB and CA conceptualized the study. SB and DK collected the data. SB and CA analysed the data. DK, CA, SB, BG, VPS and CLR contributed to the first and subsequent drafts. All the authors contributed and reviewed the final manuscript, and agreed for submission.

## Burdens and Risk Groups of Road Crashes

### References

- [1] World Health Organization, WHO, Geneva, Switzerland, World Report on Road Traffic Injury Prevention, 2004, <https://www.who.int/publications/i/item/world-report-on-road-traffic-injury-prevention>.
- [2] Janstrup KH, Road Safety Annual Report 2017, Technical University of Denmark. 2017, [https://orbit.dtu.dk/files/142180809/Road\\_safety\\_annual\\_report\\_2017.pdf](https://orbit.dtu.dk/files/142180809/Road_safety_annual_report_2017.pdf).
- [3] M.F.M. Yusoff, N.A. Mohamad, N.G.M. Nor (editors), “Malaysian value of fatal and non-fatal injury due to road accident: The willingness to pay using conjoint analysis study”, in *Proceedings of the Eastern Asia Society for Transportation Studies*, The 9th International Conference of Eastern Asia Society for Transportation Studies, 2011.
- [4] R. Silcock, “Guidelines for estimating the cost of road crashes in developing countries,” Department for International Development, London, 2003.
- [5] World Health Organization, WHO, Geneva, Switzerland, Introduction and Methods: Assessing the environmental burden of disease at national and local levels, 2003, [https://www.who.int/quantifying\\_ehimpacts/publications/en/9241546204.pdf](https://www.who.int/quantifying_ehimpacts/publications/en/9241546204.pdf).
- [6] World Health Organization, Road traffic injuries: WHO, 2013, <https://www.who.int/news-room/fact-sheets/detail/road-traffic-injuries>.
- [7] World Health Organization, WHO, Global Status Reports on Road Safety, 2018, <https://www.who.int/publications/i/item/9789241565684>.
- [8] D. Sapkota, B. Bista, and S.R. Adhikari, “Economic costs associated with motorbike accidents in Kathmandu, Nepal,” *Frontiers in Public Health*, 2016.
- [9] World Health Organization, WHO, The Global Burden of Disease, 2004, [www.who.int/healthinfo/global\\_burden\\_disease/GBD\\_report\\_2004update\\_part4.pdf](http://www.who.int/healthinfo/global_burden_disease/GBD_report_2004update_part4.pdf).
- [10] Global Health Data Exchange, GHDX, Global burden of disease results tool 2019, <http://ghdx.healthdata.org/gbd-results-tool>.
- [11] M. Peden, K. McGee, and G. Sharma, “The injury chart book: a graphical overview of the global burden of injuries,” Geneva, World Health Organization. 2002(5).
- [12] District Development Office, Kaski, Rural Infrastructure Developers Consultants P. Ltd., “District Transport Master Plan (DTMP) of Kaski District: 2015,” <https://dckaski.gov.np/wp-content/uploads/2015/09/Kaski-DTMP-Final-Report-final.pdf>.
- [13] G.D. Ruxton, “The unequal variance t-test is an underused alternative to Student's t-test and the Mann–Whitney U test,” *Behavioral ecology*, pp 688-90, 2006.
- [14] Graphpad, Online, Welch’s unpaired t test, <https://www.graphpad.com/quickcalcs/ttest1/>.
- [15] Nepal Rastra Bank (Nepali), Foreign exchange rates, Showing exchange rate for December 2017, <https://www.nrb.org.np/forex/>.



## Burdens and Risk Groups of Road Crashes

- [16] World Health Organization, WHO, The global burden of disease: 2004, Update 2008, <https://apps.who.int/iris/handle/10665/43942>.
- [17] Government of Nepal, MoF, Economic Survey 2015, [https://mof.gov.np/uploads/document/file/Final%20Economic%20Survey%202071-72%20English%20\(Final\)\\_20150716082638.pdf](https://mof.gov.np/uploads/document/file/Final%20Economic%20Survey%202071-72%20English%20(Final)_20150716082638.pdf).
- [18] D. Donev, L. Zaletel-Kragelj, V. Bjegovic, and G. Burazeri, “Measuring the burden of disease: disability adjusted life year (DALY),” *Methods and tools in public health*, pp. 715, 2010.
- [19] Murray C, Lopez A, Mathers C, “Assessing health needs: the global burden of disease approach,” Oxford textbook of public health, Volume 1: the scope of public health, pp. 256-71, 2009.
- [20] S.K. Joshi, “Economic and social burden due to injuries and violence in Nepal: a cross-sectional study,” *Kathmandu University medical journal*, pp. 342-8, 2009.
- [21] M.O.N. Nnadi, O.B. Bankole, and B.G. Fente, “Motorcycle-related traumatic brain injuries: helmet use and treatment outcome,” *Neuroscience Journal*, 2015.
- [22] A. A. Al-Thaifani, N. A. Al-Rabeei, and A. M. Dallak, “Study of the injured persons and the injury pattern in road traffic accident in Sana’a city, Yemen,” *Advances in Public Health*, 2016.
- [23] M. Rad, A. L. Martiniuk, A. Ansari-Moghaddam, M. Mohammadi, F. Rashedi, and A. Ghasemi, “The pattern of road traffic crashes in South East Iran,” *Global journal of health science*, pp. 149, 2016.
- [24] N. Jha, “Road traffic accident cases at BPKIHS, Dharan, Nepal: One year in retrospect,” *Journal of Nepal Medical Association*, pp. 241-4, 1997.
- [25] O. Banuls, “Epidemiologic study of accidents attended in a non-hospital emergency service,” *Atencion primaria*, pp. 522-6, 1998.
- [26] M. Ahmed, M. A. Shah, S. Luby, P. Drago-Johnson, and S. Wali, “Survey of surgical emergencies in a rural population in the Northern Areas of Pakistan,” *Tropical medicine & international health*, pp. 846-57, 1999.
- [27] P. Tiwari, L. Gite, A. Dubey, and L. Kot, “Agricultural injuries in central India: nature, magnitude, and economic impact,” *Journal of agricultural safety and health*, 2002.
- [28] C. Moshiri, I. Heuch, A.N. Åstrøm, P. Setel, Y. Hemed, and G. Kvåle, “Injury morbidity in an urban and a rural area in Tanzania: an epidemiological survey,” *BMC public health*. 2005.
- [29] A.J. Thapa, “Status paper on road safety in Nepal, DDG, Department of Roads Kathmandu, Nepal, 2013.
- [30] A.M. Bachani, P. Koradia, H.K. Herbert, S. Mogere, D. Akungah, J. Nyamari et al., “Road traffic injuries in Kenya: the health burden and risk factors in two districts,” *Traffic injury prevention*, pp. 24-30, suppl, 2012.
- [31] M. Kudabong, “Social cost of motorcycle accidents-a case study of the bolgatanga municipality: University of Ghana,” 2009.

## Burdens and Risk Groups of Road Crashes

- [32] M. Peden, R. Scurfield, D. Sleet, D. Mohan, A.A. Hyder, E. Jarawan et al., “World report on road traffic injury prevention,” World Health Organization Geneva, 2004.
- [33] M. Karim, A.W. Khan, S. Farah, “Economic impact of road traffic accident on patients attending at National Institute of Traumatology and Orthopedic Rehabilitation (NITOR), Dhaka,” *Ibrahim cardiac medical journal*, pp. 45-9, 2013.
- [34] S. Prinja, J. Jagnoor, A. S. Chauhan, S. Aggarwal, R. Ivers, “Estimation of the economic burden of injury in north India: a prospective cohort study,” *The Lancet*, S57, 2015.
- [35] D. Mohan, “Social cost of road traffic crashes in India,” in *Proceedings of first safe community conference on cost of injury*, Viborg, Denmark, 2002.
- [36] C. Staton, J. Vissoci, E. Gong, N. Toomey, R. Wafula, J. Abdelgadir et al., “Road Traffic Injury Prevention Initiatives: A Systematic Review and Metasummary of Effectiveness in Low and Middle Income Countries,” *PloS one*, 2016.
- [37] United Nations Population Funds, UNFPA, Nepal, Population situation analysis of Nepal, <https://nepal.unfpa.org/sites/default/files/pub-pdf/pdf>.
- [38] Population Growth Calculator, Online, <https://calculator.academy/population-growth-calculator/#f1p1f2p0>.
- [39] A. Banstola, J. Kigozi, P. Barton, and J. Mytton, “Economic burden of road traffic injuries in Nepal,” *International journal of environmental research and public health*, 2020.
- [40] P. R. Pant, A. Banstola, S. Bhatta, J.A. Mytton, D. Acharya, S.Bhattarai et al., “Burden of injuries in Nepal, 1990–2017: findings from the global burden of disease study 2017, *Injury prevention*, suppl 1, i57- i66, 2020.
- [41] Open Epi V3.01, Online, Sample size for frequency in a population, <http://www.openepi.com/SampleSize/SSPropor.htm>

## Burdens and Risk Groups of Road Crashes

### List of Tables

Table 1. Socio-Demographic characteristics of respondent

| Socio Demographic variable      | n=107 (10.5 months) |                |
|---------------------------------|---------------------|----------------|
|                                 | Frequencies(n)      | Percentage (%) |
| Sex                             |                     |                |
| Male                            | 65                  | 60.7           |
| Female                          | 42                  | 39.3           |
| Age group                       |                     |                |
| 0-14                            | 8                   | 7.5            |
| 15-24                           | 32                  | 29.9           |
| 25-44                           | 36                  | 37.4           |
| 45-64                           | 25                  | 23.4           |
| 65+                             | 2                   | 1.9            |
| Ethnic Group                    |                     |                |
| Upper caste                     | 50                  | 46.7           |
| Dalit                           | 22                  | 20.6           |
| Relatively advantaged ethnicity | 19                  | 17.8           |
| Disadvantaged non dalit terai   | 11                  | 10.3           |
| Disadvantaged ethnicity         | 4                   | 3.7            |
| Religious minorities            | 1                   | 0.9            |
| Education                       |                     |                |
| University or more              | 35                  | 32.7           |
| Higher secondary                | 32                  | 29.9           |
| Secondary                       | 18                  | 16.8           |
| Primary                         | 8                   | 7.5            |
| Read and write                  | 6                   | 5.6            |
| Illiterate                      | 8                   | 7.5            |
| Occupation                      |                     |                |
| Unemployed                      | 43                  | 40.2           |
| Job                             | 33                  | 30.8           |
| Business                        | 17                  | 15.9           |
| Agriculture                     | 9                   | 8.4            |
| Foreign employment              | 5                   | 4.7            |
| Economic quintiles              |                     |                |
| Highest                         | 41                  | 38.3           |
| Upper                           | 25                  | 23.4           |
| Middle                          | 18                  | 16.8           |
| Second                          | 17                  | 15.9           |
| Lowest                          | 6                   | 5.6            |

Table 2. Frequency distribution of injuries and vehicle involvement of RTC

| Characteristics | n=107 (10.5 months) |              |
|-----------------|---------------------|--------------|
|                 | Frequencies (n)     | Percentage % |

## Burdens and Risk Groups of Road Crashes

|                                   |    |      |
|-----------------------------------|----|------|
| Affected                          |    |      |
| Injury only                       | 88 | 82.2 |
| Death                             | 19 | 17.8 |
| Injury outcome                    |    |      |
| Slight Injury                     | 36 | 33.6 |
| Serious Injury                    | 54 | 50.5 |
| Fatal Injury                      | 17 | 15.9 |
| Involved Vehicles                 |    |      |
| Bike                              | 52 | 48.6 |
| Bus/Truck                         | 22 | 20.6 |
| Pedestrian/Cyclists               | 17 | 15.9 |
| Car/Jeep/Van                      | 16 | 15.0 |
| Reported reason for RTC           |    |      |
| Overtake or over speed            | 29 | 27.1 |
| Carelessness of others/pedestrian | 27 | 25.2 |
| Road condition                    | 21 | 19.6 |
| Drink and drive                   | 12 | 11.2 |
| Violation of traffic rules        | 11 | 10.3 |
| Vehicle condition                 | 7  | 6.5  |
| Mechanism of Injury               |    |      |
| Laceration                        | 26 | 24.3 |
| Fracture                          | 20 | 18.7 |
| Head injury                       | 12 | 11.2 |
| Leg injury                        | 9  | 8.4  |
| Spinal cord injury                | 8  | 7.5  |
| Muscle Injury                     | 6  | 5.6  |
| Amputation                        | 4  | 3.7  |
| Functional Impairment             | 3  | 2.8  |

Table 3. Total DALYs Lost during the period of 1<sup>st</sup> Nov, 2016-15<sup>th</sup> Sep, 2017

| SN | Indicator/Duration                           | Burden of RTC           |                                  |                 |
|----|----------------------------------------------|-------------------------|----------------------------------|-----------------|
|    |                                              | Year of life lost (YLL) | Year Lived with Disability (YLD) | DALYs (YLL+YLD) |
| 1  | Raw scores from survey (10.5 months)         | 508.6                   | 4.43                             | 513.11          |
| 2  | <sup>#</sup> Adjusted (1 year)               | 579.80                  | 5.05                             | 584.85          |
| 3  | <sup>\$</sup> Per million person-year (2017) | 1008.85                 | 8.78                             | 1017.64         |

<sup>#</sup>Multiplied by 1.14 of survey raw score;

<sup>\$</sup>Population projection of Kaski district based on Census 2011 (492,098 and PGR=2.57)<sup>[34]</sup>

## Burdens and Risk Groups of Road Crashes

*Table 4. Mean differences of DALYs in selected socio-demographic characteristics*

| Variable (n)      | Mean(sd)    | *P value |
|-------------------|-------------|----------|
| Age group         |             |          |
| Inactive (31)     | 7.7(13.26)  | .13      |
| Active (76)       | 3.59(9.77)  |          |
| Sex               |             |          |
| Male (65)         | 4.71(10.94) | .93      |
| Female (42)       | 4.91(11.20) |          |
| Educational level |             |          |
| Illiterate (8)    | 1.4(15.96)  | .74      |
| Literate+ (99)    | 3.4(9.38)   |          |
| Employability     |             |          |
| Employed (64)     | 3.7(8.4)    | .14      |
| Unemployed (43)   | 7.2(13.7)   |          |

\*Unequal variance (Welch's unpaired) t-test (two-tailed)

*Table 5 Correlation between Cost and DALYs*

| Variables                   | DALYs     |         |
|-----------------------------|-----------|---------|
|                             | Pearson r | P value |
| Indirect cost of victim     | 0.333     | <.001** |
| Indirect cost of care giver | -0.044    | .654    |
| direct cost                 | 0.159     | .103    |
| Total cost                  | 0.199     | .039*   |

\*Statistically significant at  $p < 0.05$ ; \*\* statistically significant at  $p < 0.001$



## Burdens and Risk Groups of Road Crashes

### List of figures

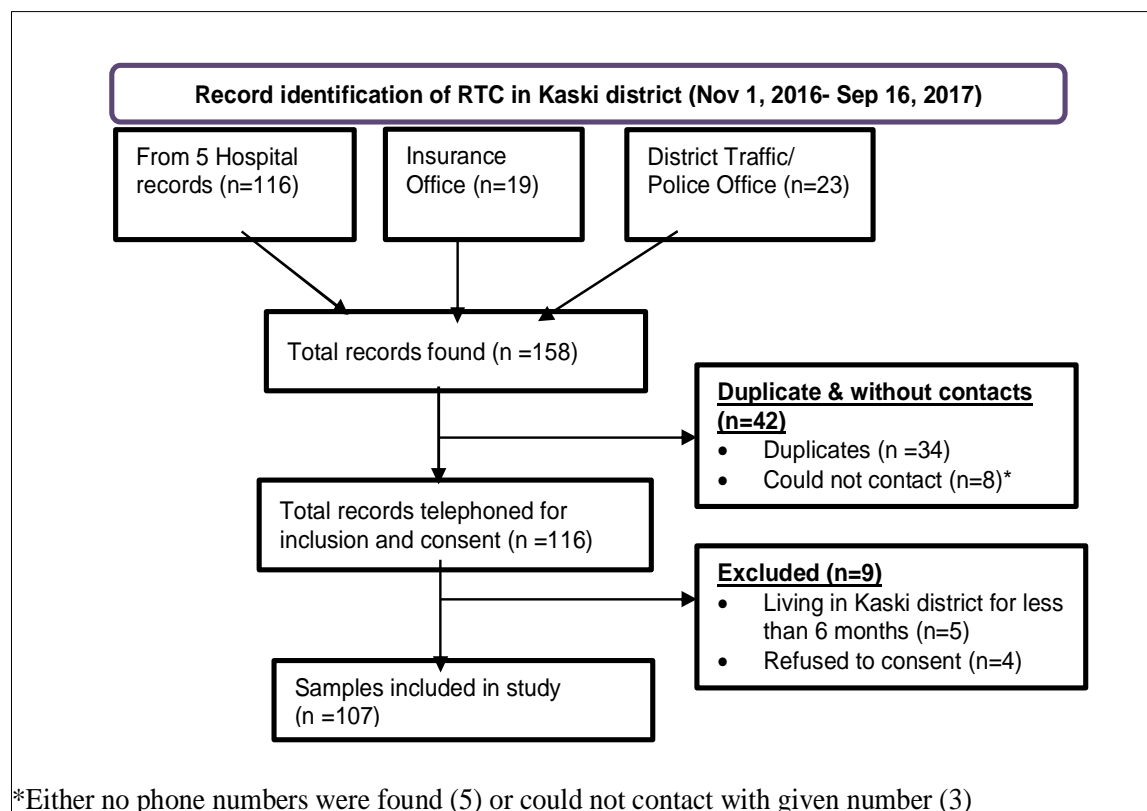

Figure 1: Sampling frame

## Burdens and Risk Groups of Road Crashes

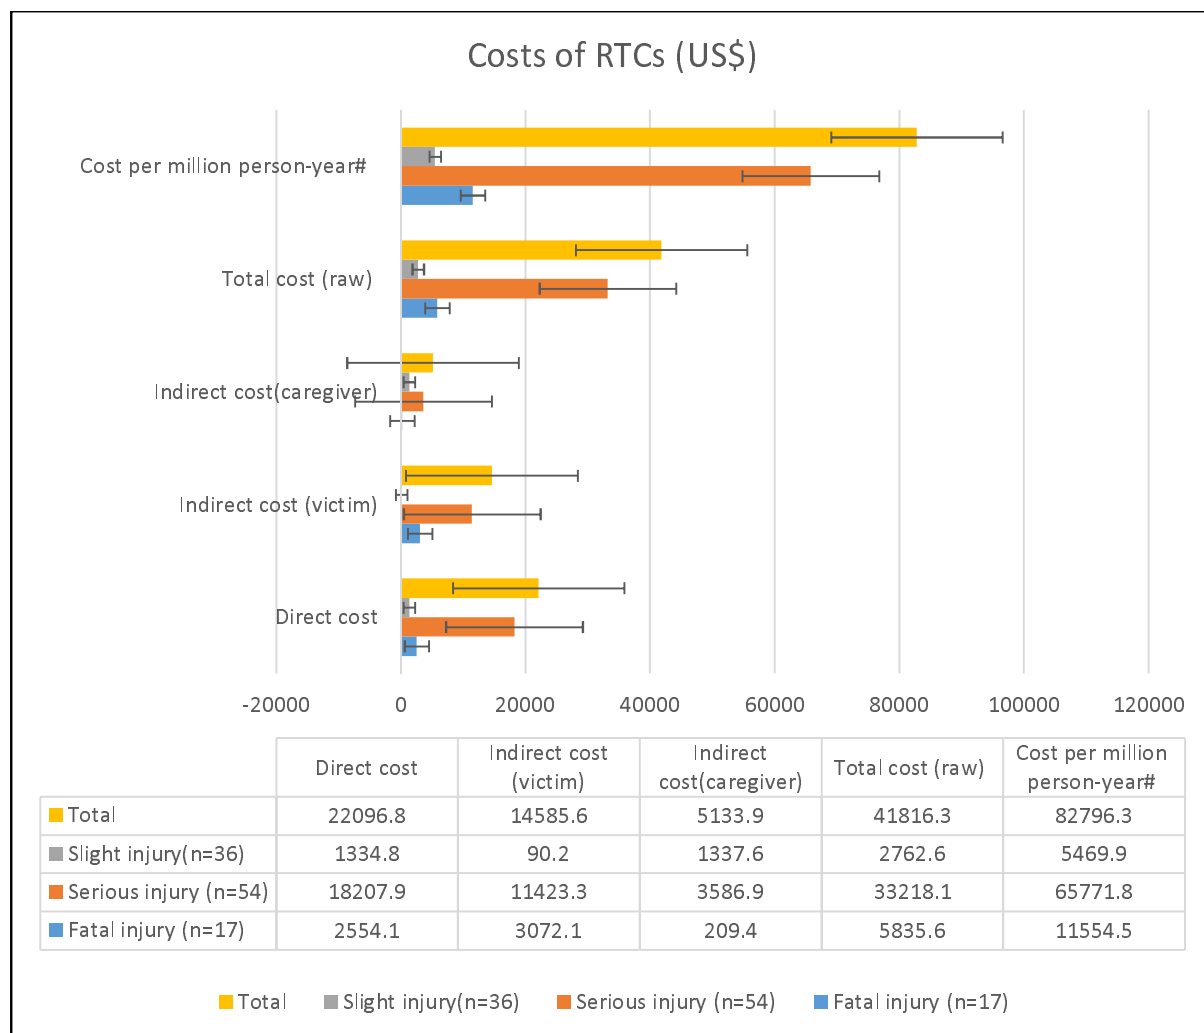

Fig. 2. Costs of RTCs in US \$ (US \$1 =NRs 102.92 as per 2017, Jun 1) with standard error bars;

#Adjusted per million person-years (multiplied by factor 1.98 calculated from  $((12/10.5)*(1000000/573026))$ )
